# Supplementary material for: Clonal lineage from normal endometrium to ovarian clear cell carcinoma through ovarian endometriosis
Source: PubMed Central journal article supplement — Cancer Sci. 2020 Jun 26;111(8):3000–9. doi: 10.1111/cas.14507 (PMC7419022; doi:10.1111/cas.14507), 2020-06-26
Supplement: CAS-111-3000-s001.pdf [file CAS-111-3000-s001.pdf]

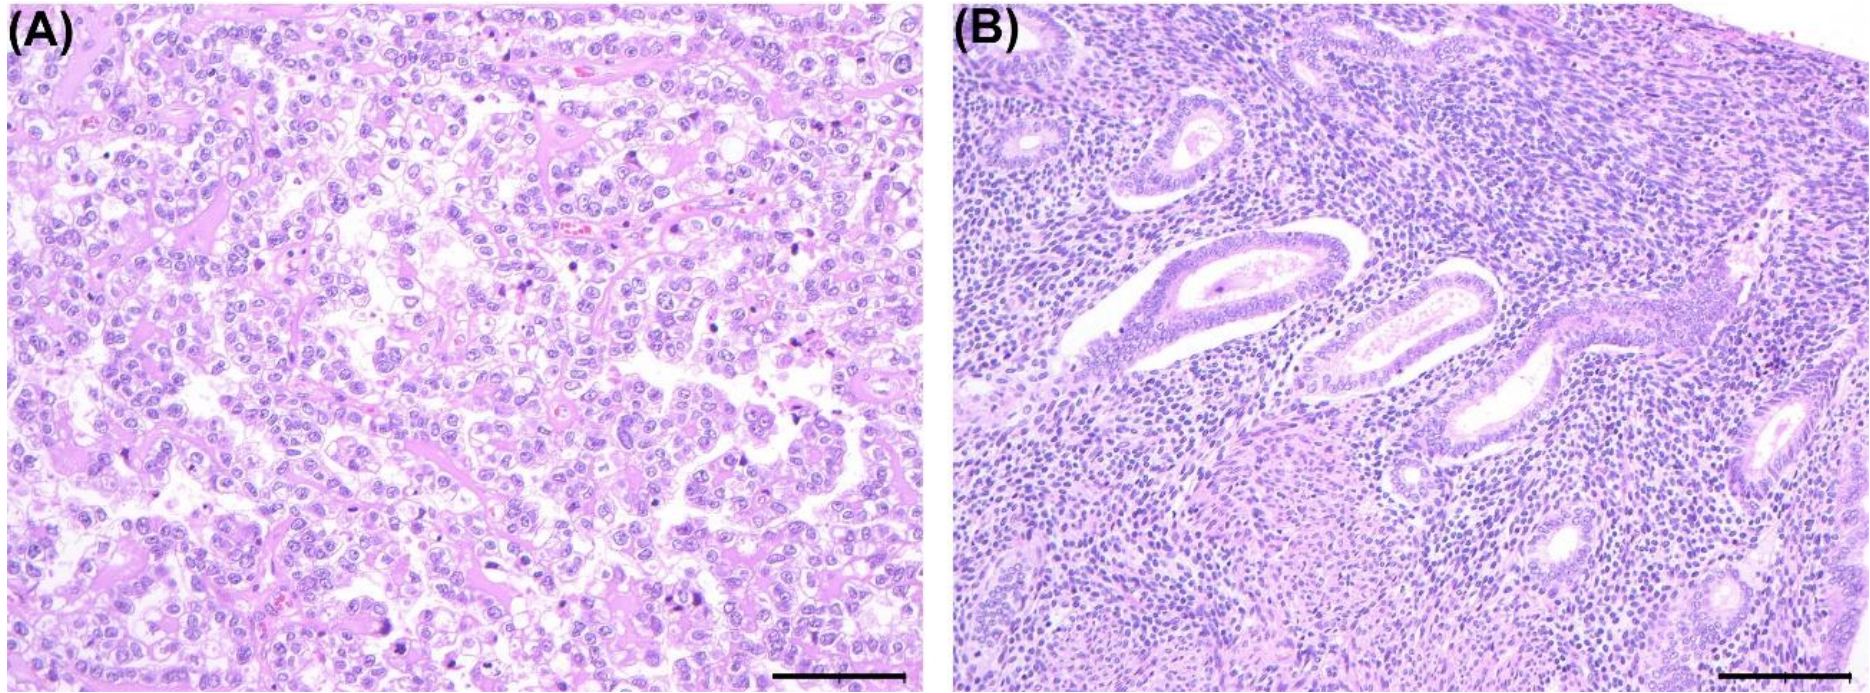

Figure S1. Histological images of formalin-fixed, paraffin embedded (FFPE) sections. Histological images of FFPE hematoxylin and eosin-stained sections of A, ovarian clear cell carcinoma and B, uterine endometrium. The scale bars represent 100  $\mu\text{m}$ .
