# Supplementary material for: Clonal lineage from normal endometrium to ovarian clear cell carcinoma through ovarian endometriosis
Source: PubMed Central journal article supplement — Cancer Sci. 2020 Jun 26;111(8):3000–9. doi: 10.1111/cas.14507 (PMC7419022; doi:10.1111/cas.14507), 2020-06-26
Supplement: CAS-111-3000-s002.pdf [file CAS-111-3000-s002.pdf]

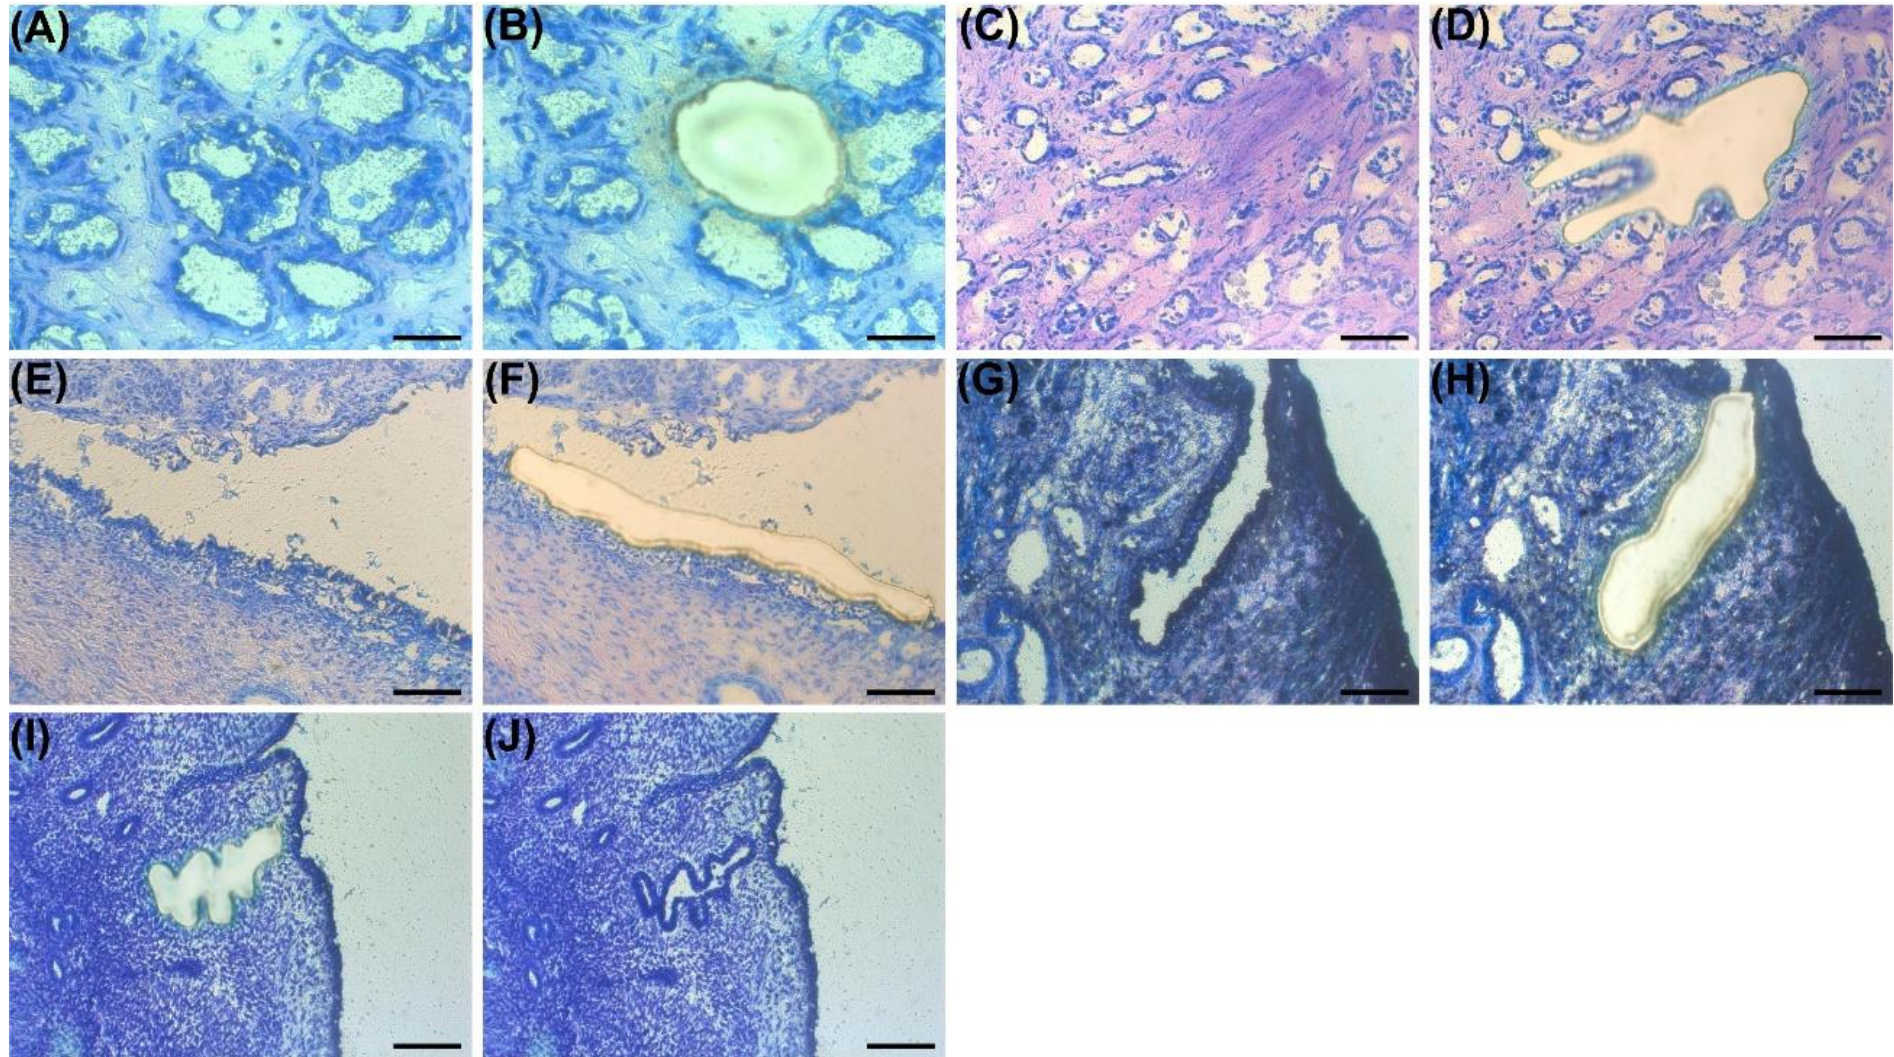

Figure S2. Images of laser microdissection (LMD) sampling. Representative images from A, C, E, G, I, before and B, D, F, H, J, after LMD sampling of A, B, ovarian clear cell carcinoma, C, D, cancer stroma, E, F, adjacent endometriosis, G, H, distant endometriosis and I, J, uterine endometrium. Frozen sections used for LMD were stained with toluidine blue. The scale bars represent 100  $\mu$ m.
