# Supplementary material for: Clonal lineage from normal endometrium to ovarian clear cell carcinoma through ovarian endometriosis
Source: PubMed Central journal article supplement — Cancer Sci. 2020 Jun 26;111(8):3000–9. doi: 10.1111/cas.14507 (PMC7419022; doi:10.1111/cas.14507), 2020-06-26
Supplement: CAS-111-3000-s003.pdf [file CAS-111-3000-s003.pdf]

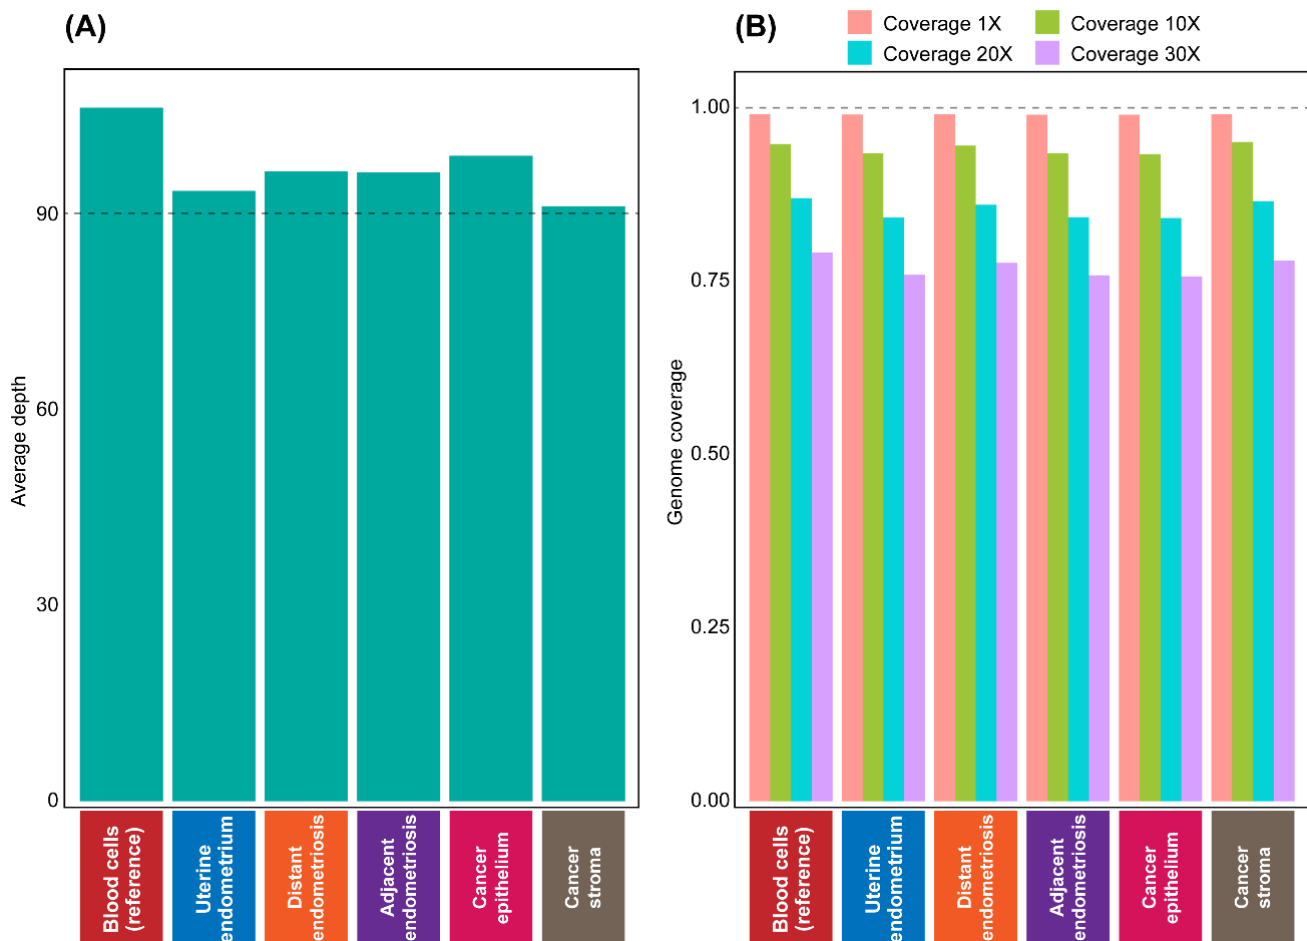

Figure S3. Average depths and coverages of whole-exome sequencing. A, Bar plots for average depths. B, Bar plots for coverages. The proportions of target or bait regions covered by at least 1, 10, 20 or 30 reads are shown.
