# Supplementary material for: Clonal lineage from normal endometrium to ovarian clear cell carcinoma through ovarian endometriosis
Source: PubMed Central journal article supplement — Cancer Sci. 2020 Jun 26;111(8):3000–9. doi: 10.1111/cas.14507 (PMC7419022; doi:10.1111/cas.14507), 2020-06-26
Supplement: CAS-111-3000-s004.pdf [file CAS-111-3000-s004.pdf]

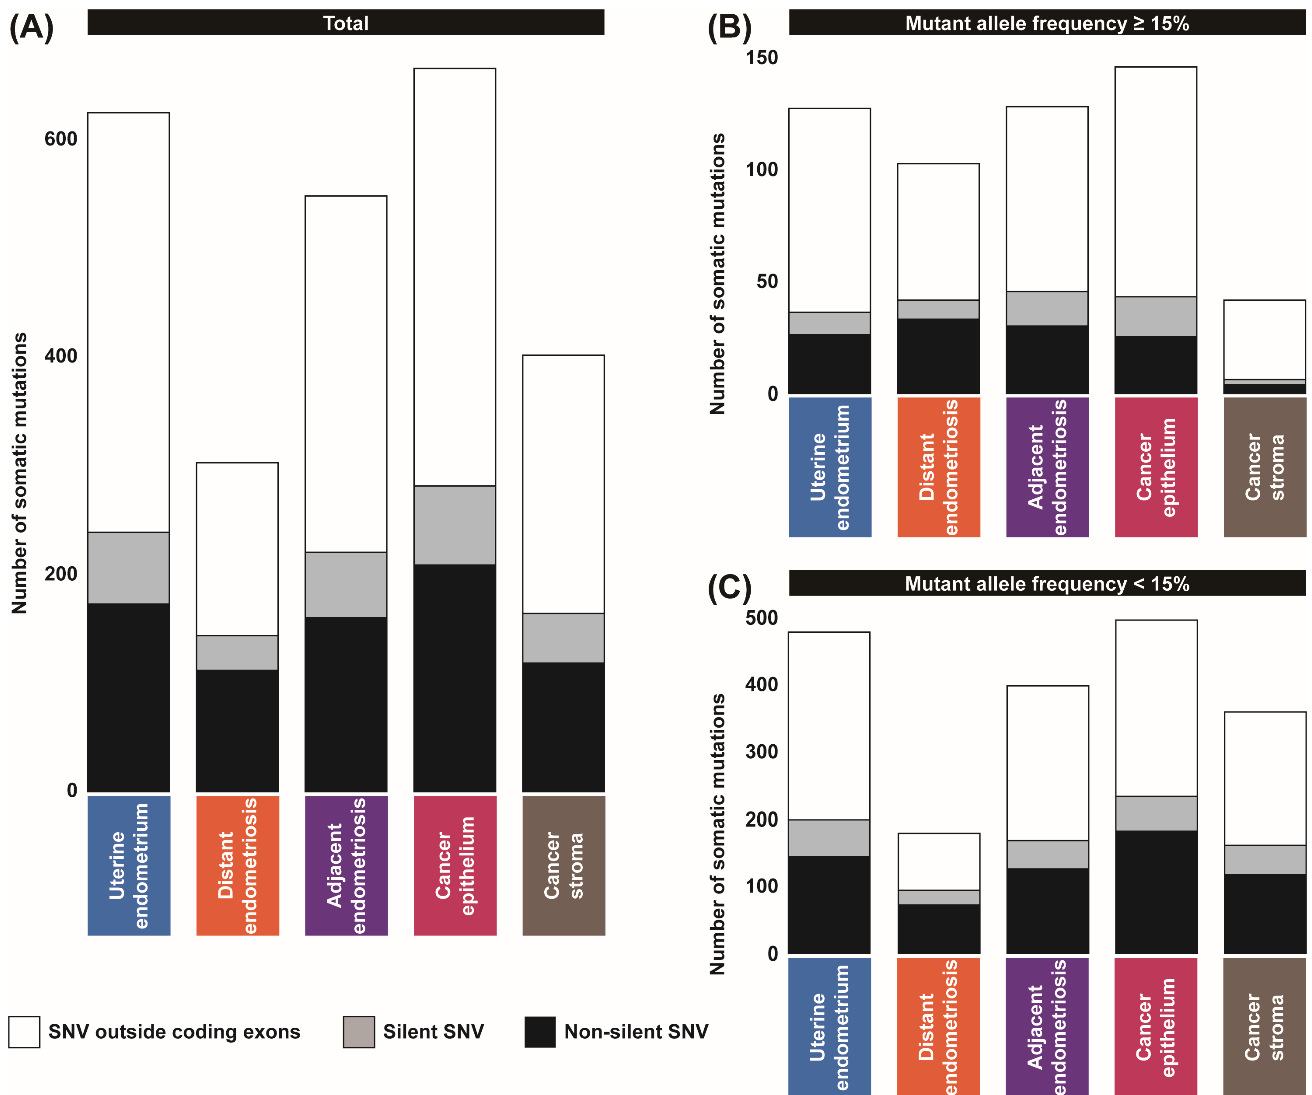

Figure S4. Number of somatic mutations in each sample subjected to whole-exome sequencing. The bar colors indicate the mutation types: black, nonsilent mutations (missense, nonsense, or splice site); gray, silent mutations (synonymous); and white, mutations outside of protein-coding exons. A, All somatic mutations. B, Somatic mutations with a high ( $\geq 0.15$ ) MAF. C, Somatic mutations with a low ( $< 0.15$ ) MAF.
