# Supplementary material for: Clonal lineage from normal endometrium to ovarian clear cell carcinoma through ovarian endometriosis
Source: PubMed Central journal article supplement — Cancer Sci. 2020 Jun 26;111(8):3000–9. doi: 10.1111/cas.14507 (PMC7419022; doi:10.1111/cas.14507), 2020-06-26
Supplement: CAS-111-3000-s005.pdf [file CAS-111-3000-s005.pdf]

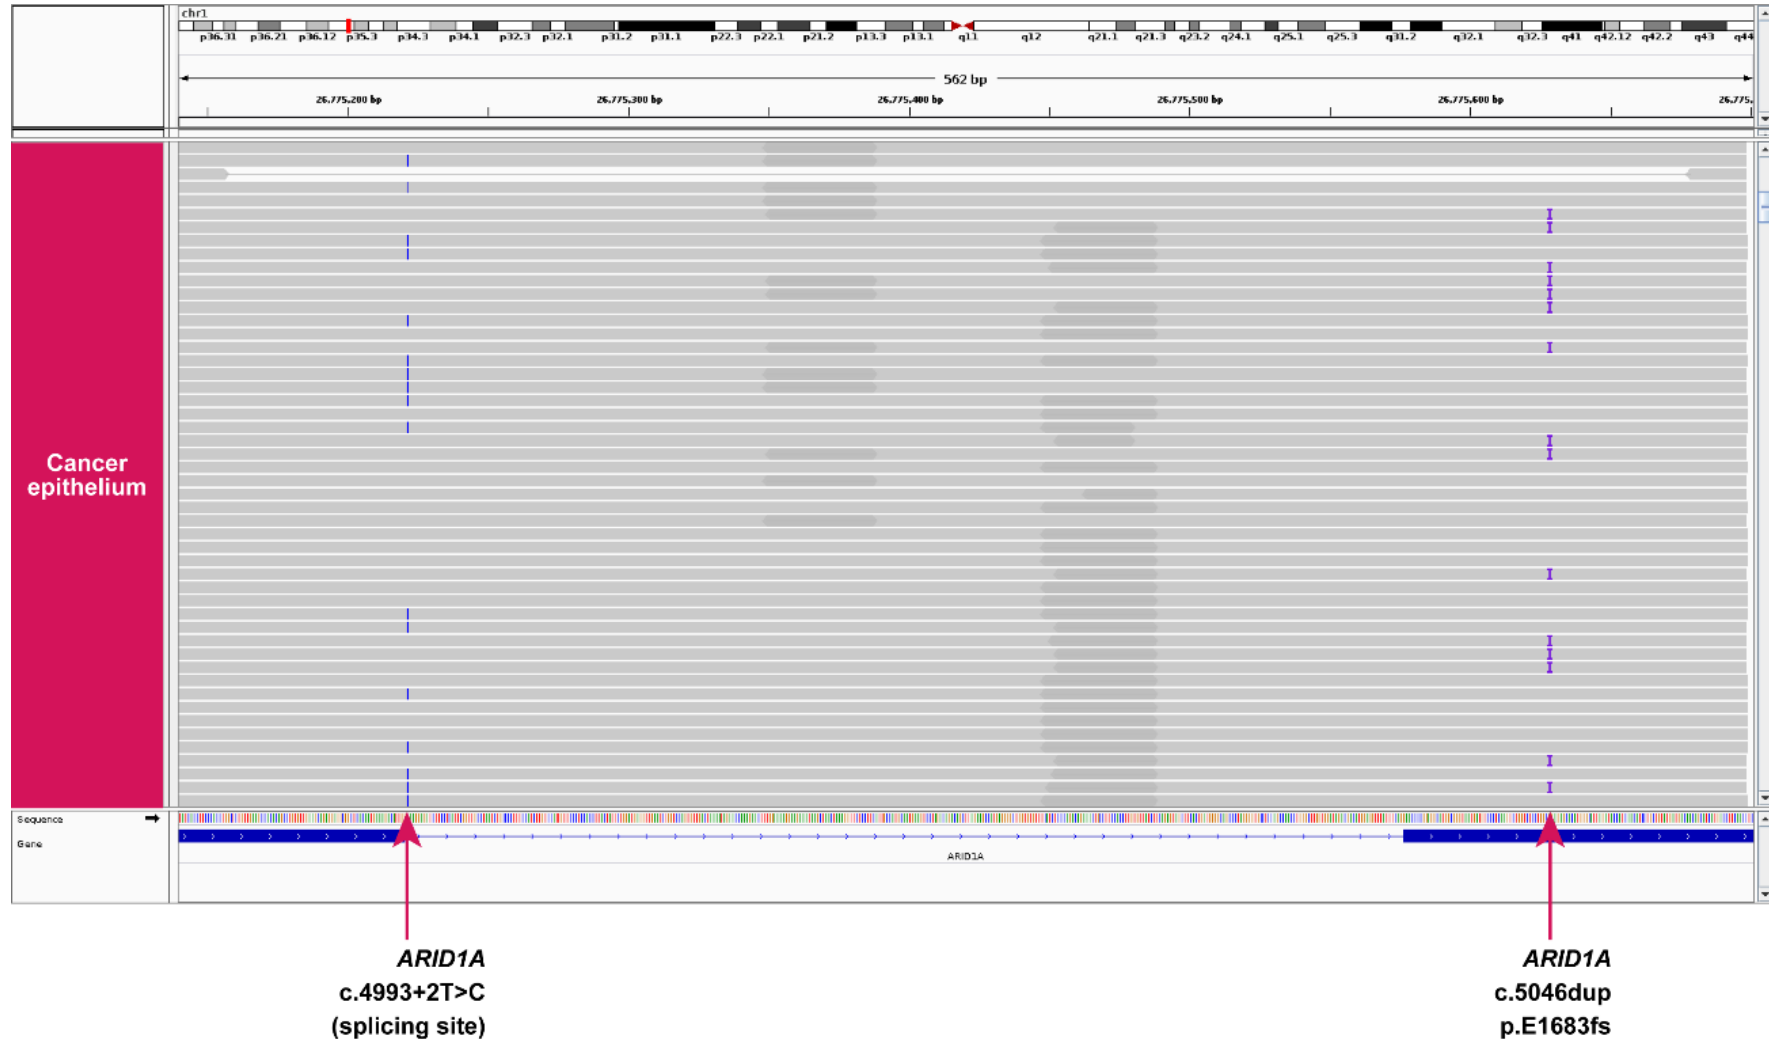

Figure S5. Haplotype phasing of two SNVs in *ARID1A*. Alignment of sequence reads around two *ARID1A* mutations in cancer epithelium samples based on amplicon sequencing in which PCR primers designed to amplify DNA fragments containing a splice donor site SNV (c.4993+2T>C) and a frameshift insertion (p.E1683fs). The alignment was visualized using IGV tools. These two mutations resided on distinct alleles and were therefore biallelic compound heterozygous mutations.
