# Supplementary material for: Clonal lineage from normal endometrium to ovarian clear cell carcinoma through ovarian endometriosis
Source: PubMed Central journal article supplement — Cancer Sci. 2020 Jun 26;111(8):3000–9. doi: 10.1111/cas.14507 (PMC7419022; doi:10.1111/cas.14507), 2020-06-26
Supplement: CAS-111-3000-s007.pdf [file CAS-111-3000-s007.pdf]

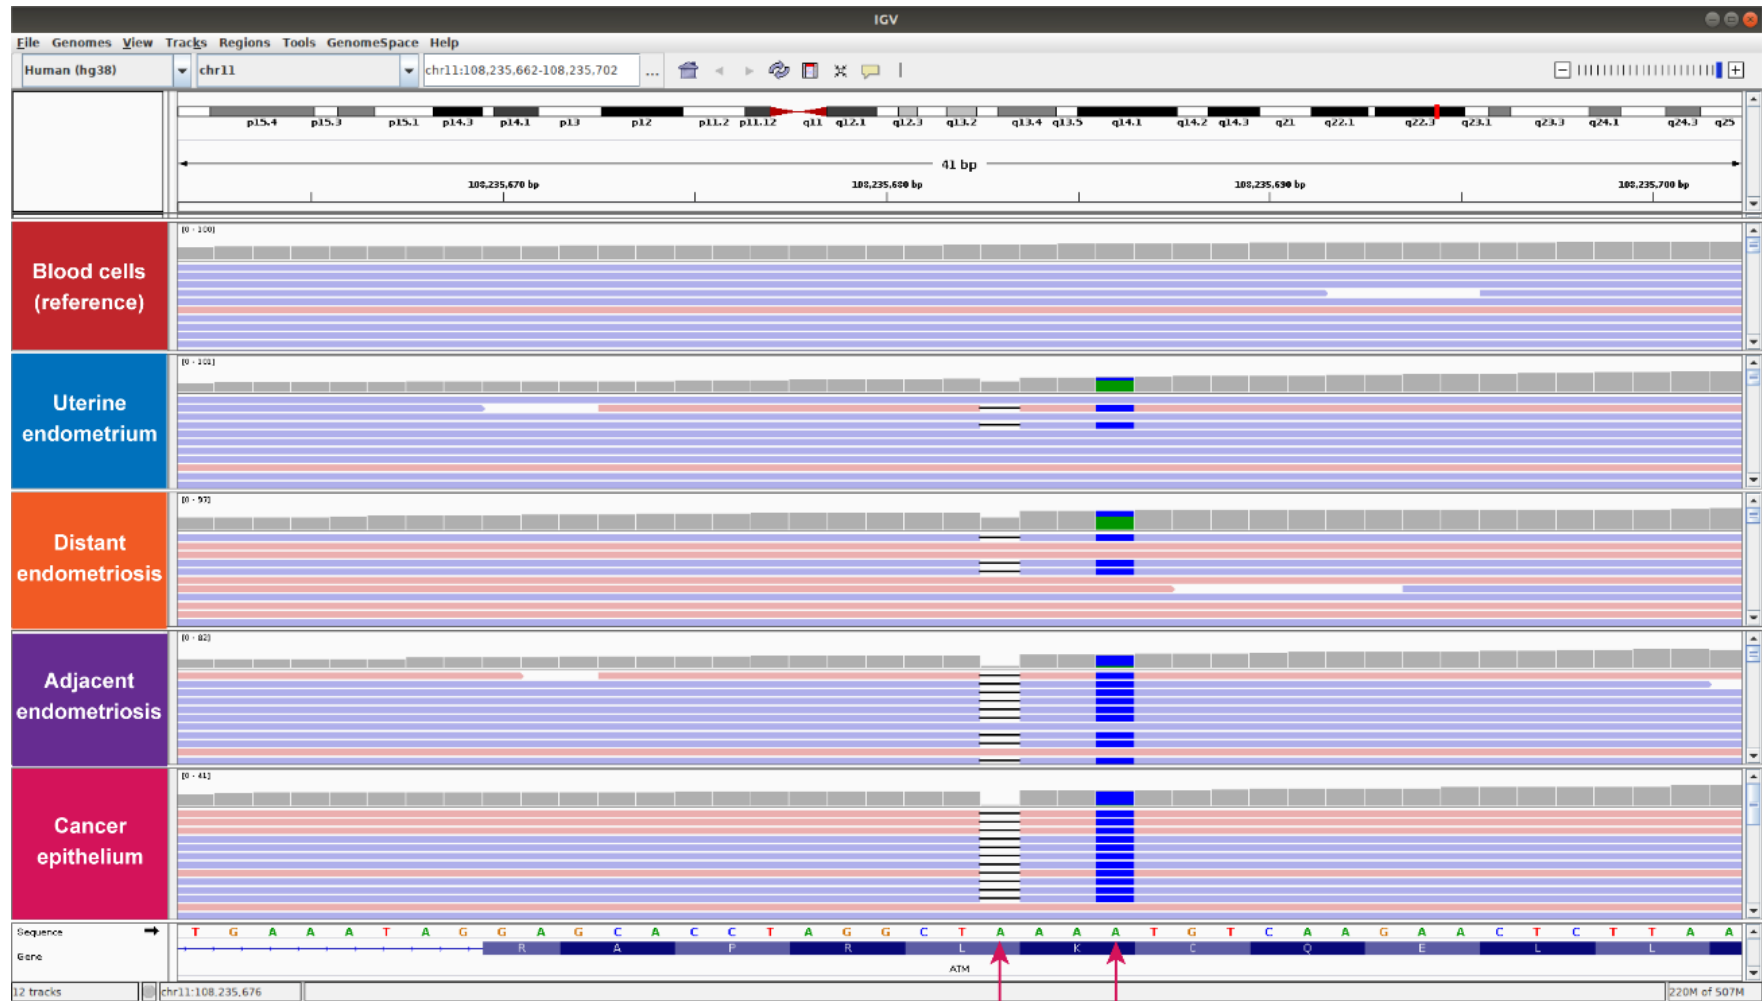

Figure S7. Alignment of sequence reads around two *ATM* mutations. Reads from whole-exome sequencing of blood, uterine endometrium, distant endometriosis, adjacent endometrium and cancer epithelium samples were visualized by IGV tools. The two mutations shown resided on the same allele in adjacent endometriosis and cancer epithelium.
