# Supplementary material for: Clonal lineage from normal endometrium to ovarian clear cell carcinoma through ovarian endometriosis
Source: PubMed Central journal article supplement — Cancer Sci. 2020 Jun 26;111(8):3000–9. doi: 10.1111/cas.14507 (PMC7419022; doi:10.1111/cas.14507), 2020-06-26
Supplement: CAS-111-3000-s009.pdf [file CAS-111-3000-s009.pdf]

Table S2. The result of allele-specific copy number analyses.

| Sample | Chromosome | Start     | End       | Total copy number | Major allele copy number | Minor allele copy number | Representative cancer-associated genes |
|--------|------------|-----------|-----------|-------------------|--------------------------|--------------------------|----------------------------------------|
| C      | 3          | 51403500  | 90242000  | 1                 | 1                        | 0                        |                                        |
| C      | 3          | 93874275  | 197960500 | 4                 | 4                        | 0                        | <i>PIK3CA</i>                          |
| C      | 5          | 140417    | 43175600  | 3                 | 2                        | 1                        |                                        |
| C      | 8          | 232934    | 36121670  | 1                 | 1                        | 0                        |                                        |
| C      | 8          | 46841213  | 117441100 | 4                 | 3                        | 1                        |                                        |
| C      | 8          | 117465900 | 141168395 | 5                 | 3                        | 2                        | <i>MYC</i>                             |
| C      | 8          | 141175174 | 145054000 | 3                 | 3                        | 0                        |                                        |
| C      | 9          | 154800    | 138175800 | 1                 | 1                        | 0                        | <i>SMARCA2, CDKN2A, CDKN2B, NOTCH1</i> |
| C      | 10         | 179900    | 38383216  | 1                 | 1                        | 0                        |                                        |
| C      | 11         | 67522513  | 102955600 | 3                 | 2                        | 1                        |                                        |
| C      | 11         | 103062300 | 134716165 | 1                 | 1                        | 0                        | <i>ATM</i>                             |
| C      | 13         | 19026389  | 22897511  | 1                 | 1                        | 0                        |                                        |
| C      | 17         | 145200    | 26982000  | 1                 | 1                        | 0                        |                                        |
| C      | 17         | 29204400  | 74381000  | 3                 | 2                        | 1                        | <i>HNF1B, ERBB2, STAT3</i>             |
| C      | 17         | 74432100  | 81194100  | 1                 | 1                        | 0                        | <i>TP53</i>                            |
| C      | X          | 288706    | 155238800 | 1                 | 1                        | 0                        |                                        |
| AE     | 5          | 173523613 | 180902400 | 1                 | 1                        | 0                        |                                        |
| AE     | 8          | 71962867  | 145054000 | 3                 | 2                        | 1                        | <i>MYC</i>                             |
| AE     | 11         | 68347900  | 68449100  | 2                 | 2                        | 0                        |                                        |
| AE     | 11         | 68537800  | 103062300 | 2                 | 2                        | 0                        |                                        |
| AE     | 11         | 103062500 | 134716165 | 2                 | 2                        | 0                        | <i>ATM</i>                             |
| AE     | 22         | 41599452  | 50780800  | 2                 | 2                        | 0                        |                                        |

Abbreviations in 'Sample' column are as follows. C: clear cell carcinoma, AE: adjacent endometriosis.
